# Supplementary material for: Micellar control of the photooxidation pathways of 10-methyl phenothiazine: electron versus energy transfer mechanisms
Source: Royal Society of Chemistry journal article supplement (doi:10.1039/c3pp50261a), 2013-10-29
Supplement: c3pp50261a.pdf [file c3pp50261a.pdf]

## Supplementary Figures

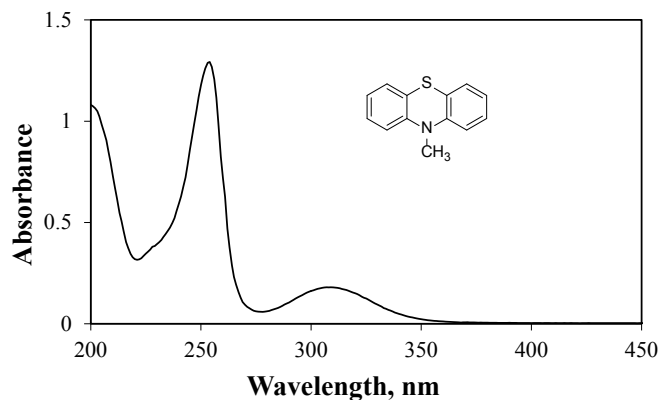

**Fig. S1** Absorption spectrum of MPS in SDS micellar solution (absorption maxima at 254 nm and 309 nm);  $[MPS]_0 = 2.0 \times 10^{-4} \text{ mol L}^{-1}$ ;  $[SDS] = 0.10 \text{ mol L}^{-1}$ ;

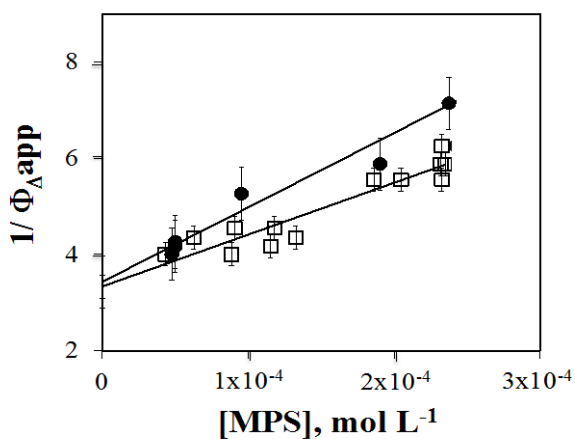

**Fig. S2** Linear relationship between  $1/\Phi_{\Delta\text{app}}$  and the concentration of MPS in SDS micellar solutions in  $D_2O$  (equation (6), § 2.3): full circles:  $[SDS] = 0.02 \text{ mol L}^{-1}$ ; open squares:  $[SDS] = 0.05 \text{ mol L}^{-1}$ .

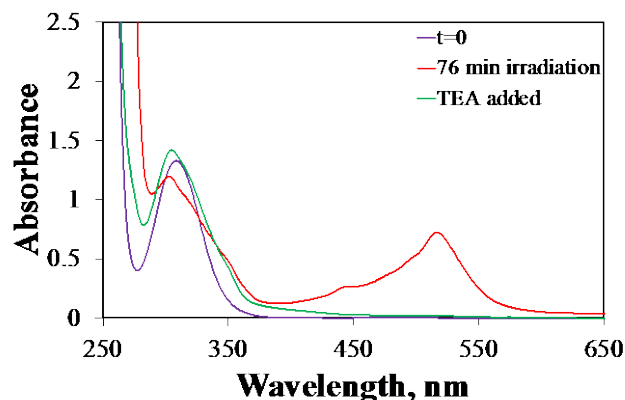

**Fig. S3** Absorption spectra of a solution of MPS in SDS micelles in H<sub>2</sub>O before irradiation (violet line), after irradiation at 308 nm during 76 min (formation of the red species) and upon addition of triethylamine (TEA) after irradiation (green line); [MPS]<sub>0</sub> = 2.0×10<sup>-4</sup> mol L<sup>-1</sup>; [SDS] = 0.02 mol L<sup>-1</sup>.

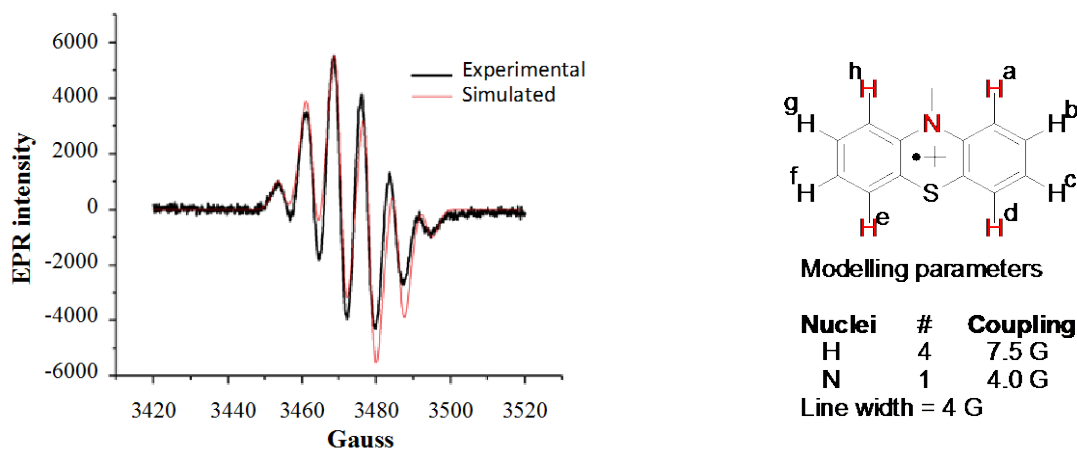

**Fig. S4** EPR spectrum obtained during the photolysis of MPS in air equilibrated SDS micellar solution (bold), overlaid with the simulated spectrum of the MPS radical cation (red line); [MPS]<sub>0</sub> = 2.0×10<sup>-4</sup> mol L<sup>-1</sup>; [SDS] = 0.02 mol L<sup>-1</sup>.

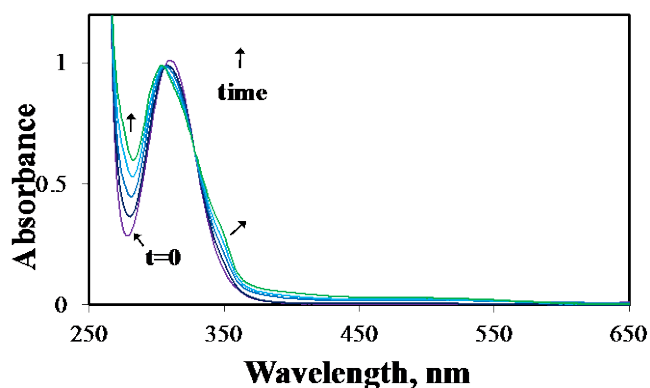

**Fig. S5** Self-sensitized photooxidation of MPS in CTAC micellar solution;  $[MPS]_0 = 2.0 \times 10^{-4}$  mol L<sup>-1</sup>;  $[CTAC] = 0.10$  mol L<sup>-1</sup>; maximum irradiation time: 986 min.

## Supplementary Table

**Table S1** Poisson Distribution ( $P(n)$ ) of MPS in SDS and CTAC micelles (equation (7), § 3.1).<sup>a)</sup>

| [Surfactant]<br>mol L <sup>-1</sup> | $N_{agg}$ <sup>b)</sup> | [M]<br>mol L <sup>-1</sup> | <S>                   | $P(0)$ | $P(1)$ | $P(2)$ | $P(3)$ | $P(4)$ |       |
|-------------------------------------|-------------------------|----------------------------|-----------------------|--------|--------|--------|--------|--------|-------|
| SDS <sup>c)</sup>                   | 0.02                    | 56                         | $2.11 \times 10^{-4}$ | 1.00   | 0.37   | 0.37   | 0.18   | 0.06   | 0.015 |
|                                     | 0.05                    | 64                         | $6.53 \times 10^{-4}$ | 0.32   | 0.73   | 0.23   | 0.04   | 0.00   | 0.00  |
|                                     | 0.10                    | 75                         | $1.22 \times 10^{-3}$ | 0.17   | 0.84   | 0.14   | 0.00   | 0.00   | 0.00  |
| CTAC <sup>c)</sup>                  | 0.02                    | 89                         | $2.11 \times 10^{-4}$ | 0.99   | 0.37   | 0.37   | 0.18   | 0.06   | 0.02  |
|                                     | 0.05                    | 89                         | $5.48 \times 10^{-4}$ | 0.38   | 0.68   | 0.26   | 0.00   | 0.00   | 0.00  |
|                                     | 0.10                    | 89                         | $1.11 \times 10^{-4}$ | 0.19   | 0.83   | 0.16   | 0.00   | 0.00   | 0.00  |

<sup>a)</sup>  $[MPS] = 2.1 \times 10^{-4}$  mol L<sup>-1</sup>; <sup>b)</sup> B. Bales, M. Almgren, *J. Phys. Chem.*, 1995, **99**, 15153-15162;<sup>40</sup>

<sup>c)</sup> Partial molar volumes for SDS and CTAC are 246.4 mL and 365.4 mL, respectively (J. M. Corkill, J. F. Goodman, T. Walker, *Trans. Faraday Soc.*, 1967, **63**, 768-772).<sup>41</sup>
